# Supplementary material for: Twistronics in two-dimensional transition metal dichalcogenide (TMD)-based van der Waals interface
Source: Royal Society of Chemistry journal article supplement (doi:10.1039/d3ra06559f), 2024-01-01
Supplement: d3ra06559f1.pdf [file d3ra06559f1.pdf]

## Supporting Information

### Twistronics in two-dimensional TMD van der Waals interface

N. Gupta, S. Sachin, P. Kumari, S. Rani, S. Kar, S. J. Ray

Department of Physics, Indian Institute of Technology Patna,  
Bihta 801103, India

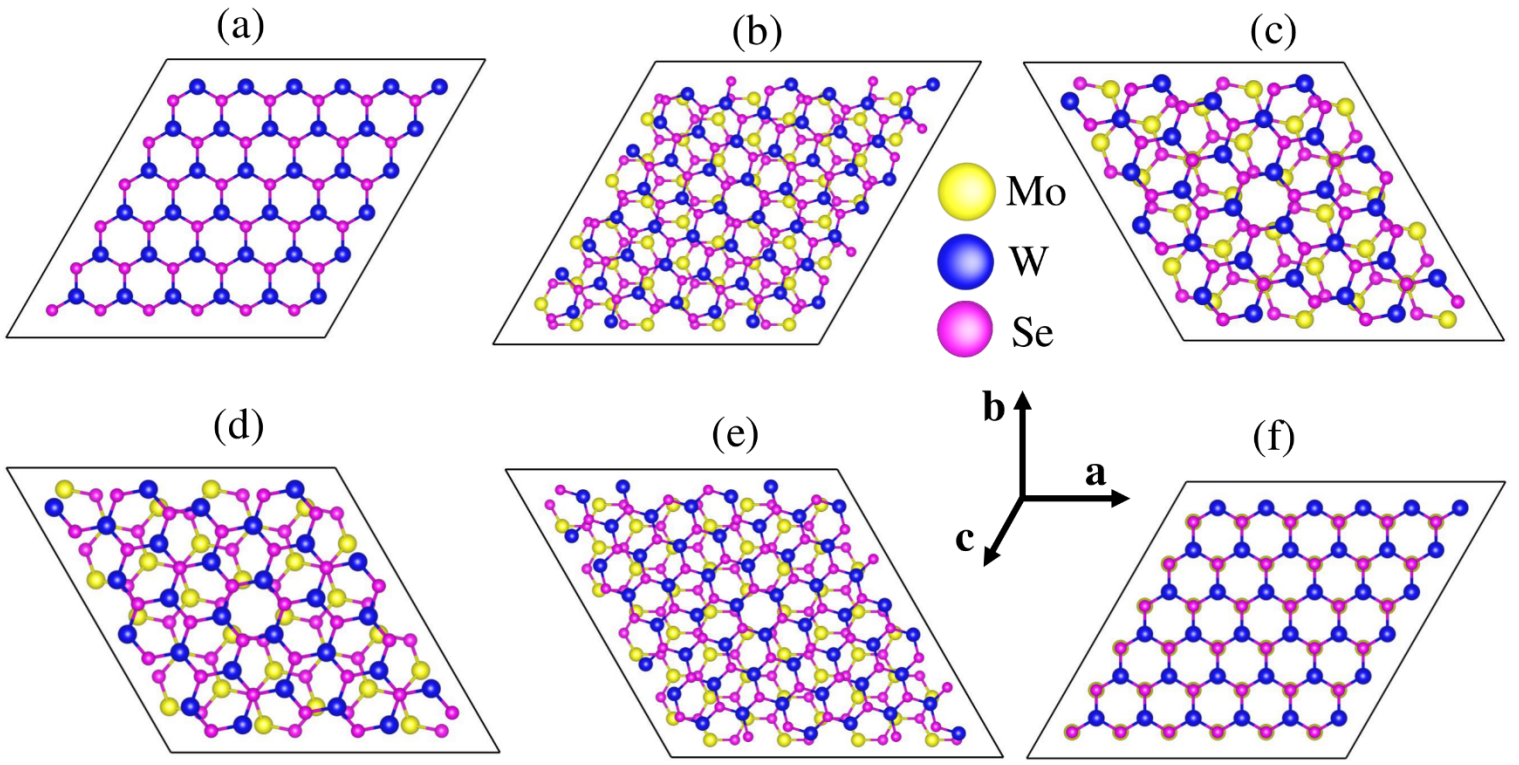

FIG. S1: The top view of twisted MoSe<sub>2</sub>/WSe<sub>2</sub> heterostructure configuration for twist angles (a) 0°, (b) 16.10°, (c) 21.79°, (d) 43.9°, and (e) 60°

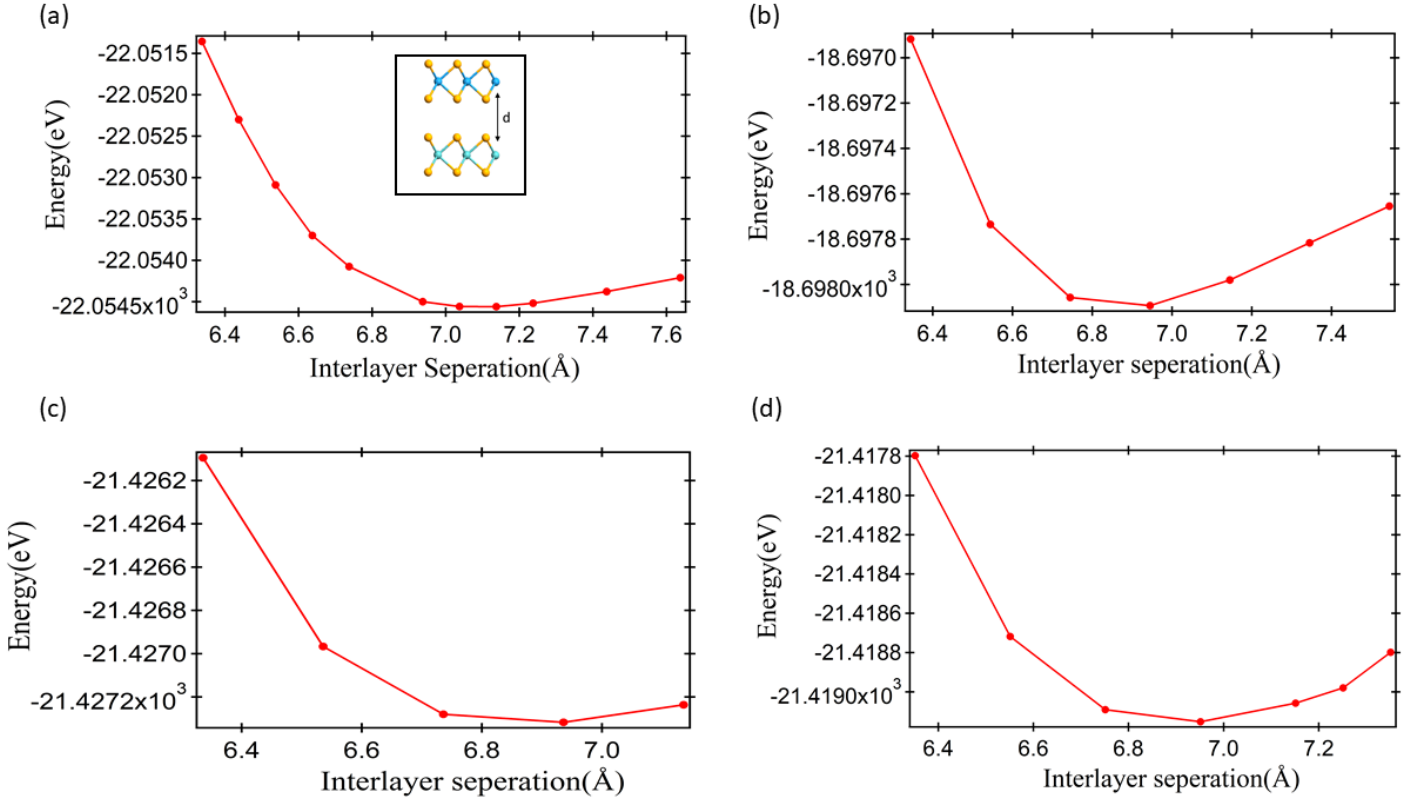

FIG. S2: Total Energy  $E$  (eV) as a function of interlayer separation  $d$  (Å) of MoSe<sub>2</sub>/WSe<sub>2</sub>, WS<sub>2</sub>/WSe<sub>2</sub>, MoSe<sub>2</sub>/WS<sub>2</sub>, and MoS<sub>2</sub>/WSe<sub>2</sub> for  $\theta = 0^\circ$

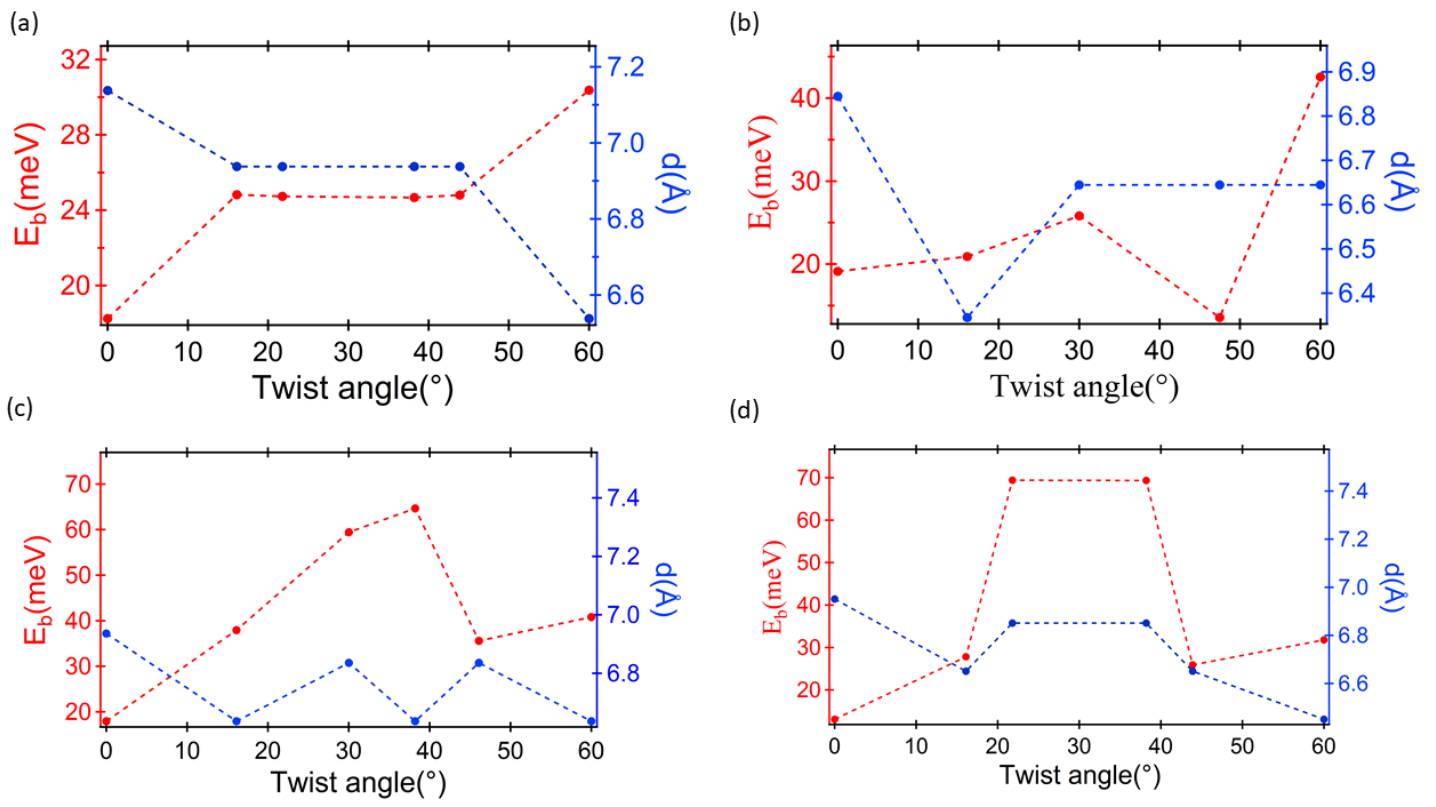

FIG.S3: Binding energy and equilibrium separation variation of  $\text{MoSe}_2/\text{WSe}_2$ ,  $\text{WS}_2/\text{WSe}_2$ ,  $\text{MoSe}_2/\text{WS}_2$ , and  $\text{MoS}_2/\text{WSe}_2$  heterostructures for different twisting angles.

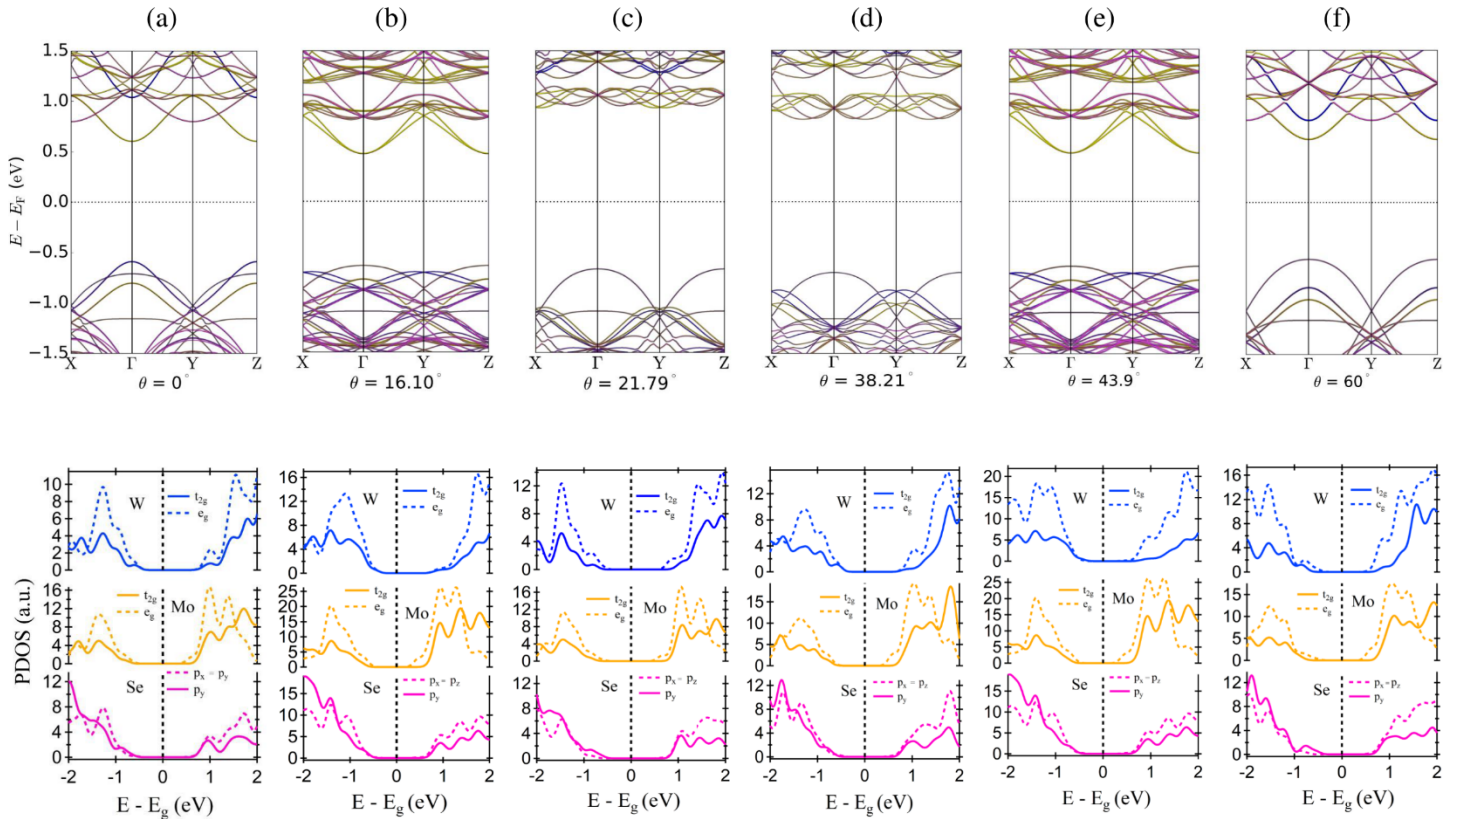

FIG. S4: The fat band structure and projected density of states of twisted  $\text{MoSe}_2/\text{WSe}_2$  heterostructure for twist angles (a)  $0^\circ$ , (b)  $16.10^\circ$ , (c)  $21.79^\circ$ , (d)  $43.9^\circ$ , and (e)  $60^\circ$ . Yellow, blue, and pink represents band contributions from Mo, W, and Se atoms respectively.

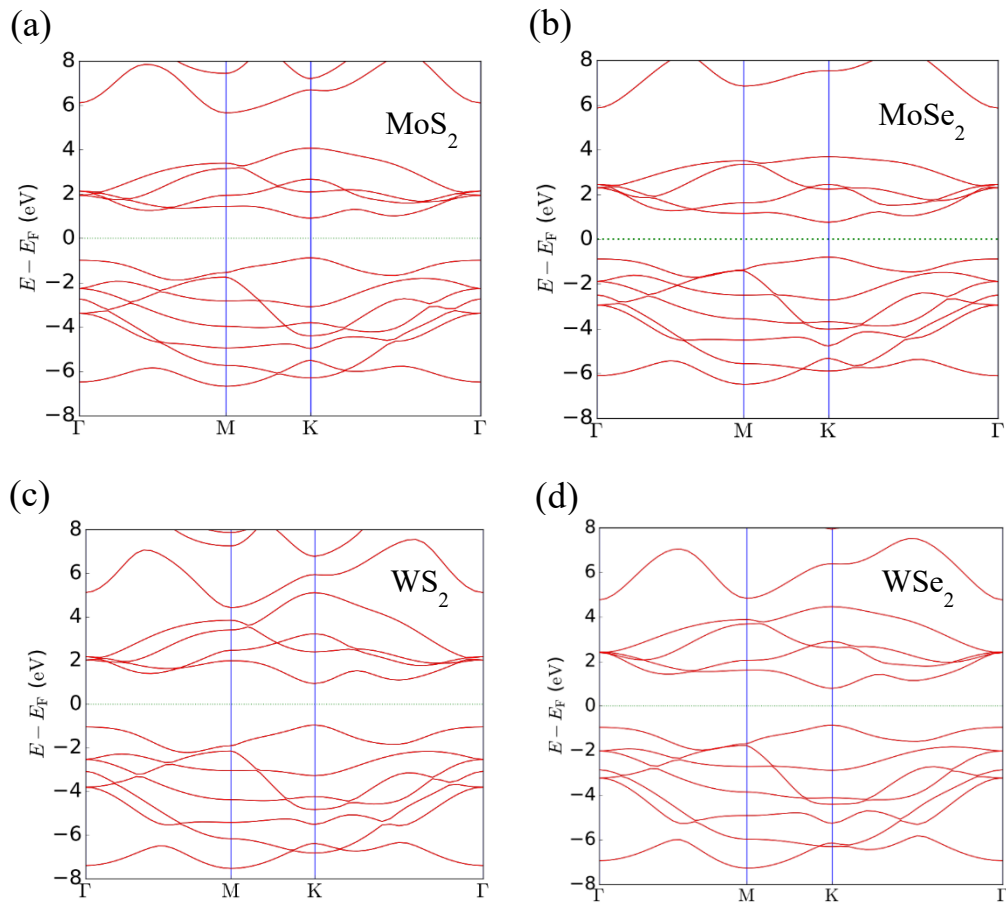

FIG. S5: The band structure of (a) MoS<sub>2</sub>, (b) MoSe<sub>2</sub>, (c) WS<sub>2</sub>, and (d) WSe<sub>2</sub>, calculated by PBE method.

Table S1: The comparison of band gap values calculating using PBE method with experimental result:

| Material          | Method | E <sub>g</sub> (eV) |
|-------------------|--------|---------------------|
| MoS <sub>2</sub>  | PBE    | 1.78                |
|                   | Expt.  | 1.90                |
| MoSe <sub>2</sub> | PBE    | 1.56                |
|                   | Expt.  | 1.57                |
| WS <sub>2</sub>   | PBE    | 1.90                |
|                   | Expt.  | 1.94-1.99           |
| WSe <sub>2</sub>  | PBE    | 1.64                |
|                   | Expt.  | 1.65                |

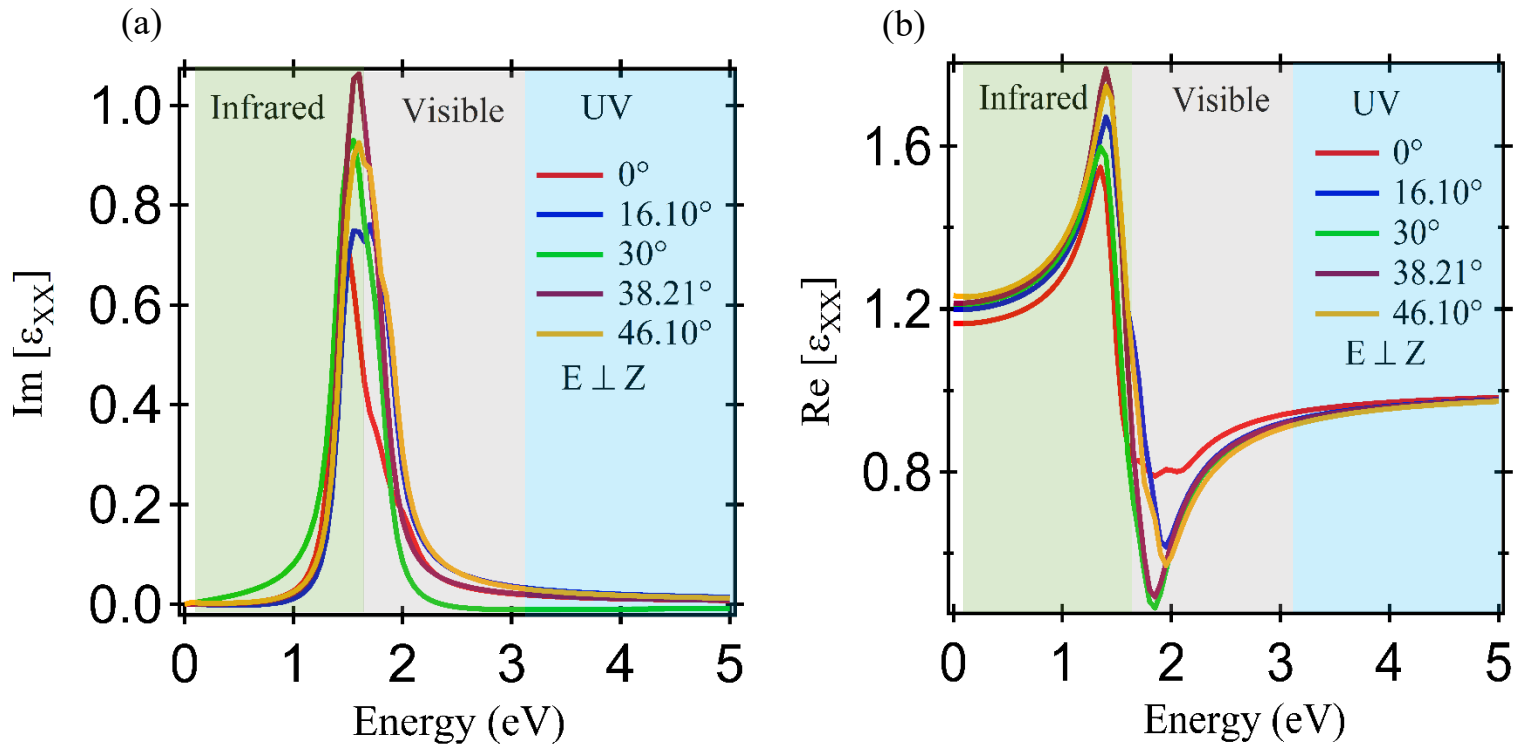

FIG. S6: (a) Variation of imaginary part of dielectric constant  $\epsilon_1(\omega)$ , and (b) real part of dielectric constant  $\epsilon_2(\omega)$  plotted as a function of photon energy (0-5 eV) along x-direction for MoSe<sub>2</sub>/WS<sub>2</sub> heterostructure with different twist angle.

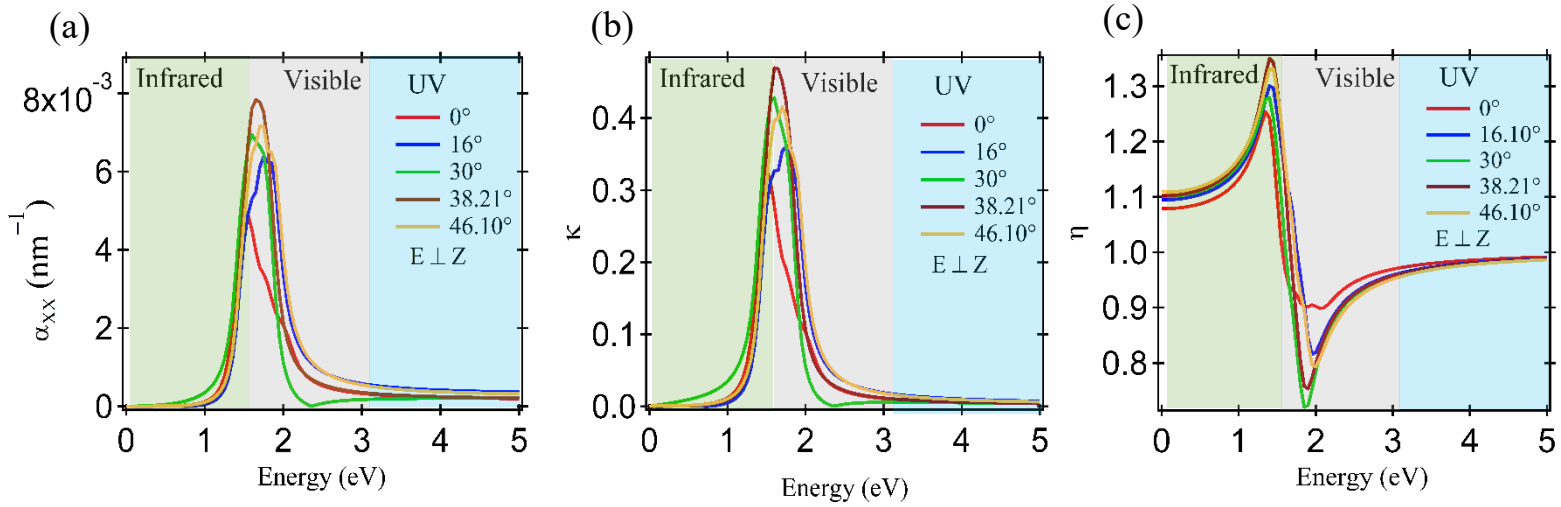

Figure S7: (a) Refractive index ( $\eta$ ), (b) Extinction coefficient ( $\kappa$ ), and (c) Absorption coefficient ( $\alpha$ ), plotted as a function of photon energy (0-5 eV) along x-direction for MoSe<sub>2</sub>/WS<sub>2</sub> heterostructure with different twist.
